# Supplementary material for: Comprehensive Insights into Ochratoxin A: Occurrence, Analysis, and Control Strategies
Source: MDPI journal article supplement (doi:10.3390/foods13081184), 2024-04-12
Supplement: s1 [file s1]

**Table S1.** Main mycotoxins, fungal producing species, major contaminated foodstuffs, and their effects on humans and animals [11-14].

| Mycotoxins                       | Fungal species                                                                                                                                      | Contaminated foodstuffs              | Toxic effects                                                                                                                                     |
|----------------------------------|-----------------------------------------------------------------------------------------------------------------------------------------------------|--------------------------------------|---------------------------------------------------------------------------------------------------------------------------------------------------|
| AFs                              | <i>A. flavus</i> , <i>A. parasiticus</i> , <i>A. Nomius</i> , <i>Penicilium</i>                                                                     | cereals, fruits, dried fruits, milk  | Carcinogenicity, hepatotoxicity, teratogenicity, suppression of immune systems, alteration of DNA structure, hepatitis, hemorrhage, renal lesions |
| Trichothecenes (DON, T2, HT2...) | <i>F. graminarum</i> , <i>F. culmorum</i> , <i>F. sporotrichioides</i>                                                                              | Cereals and legumes                  | Induction of apoptosis in progenitors, hematopoietic tissue and immune cells, impact on protein synthesis, alteration of immunoglobulins          |
| OTA                              | <i>A. ochraceus</i> , <i>P. nordicum</i> , <i>P. verrucosum</i> , <i>A. carbonarius</i> , <i>A. niger</i> , <i>A. Alliaceus</i> , <i>A. terreus</i> | Wine, grapes, coffee, cocoa, Cereals | Kidney and liver damage, loss of appetite, nausea and vomiting, immune system suppression, carcinogenic                                           |
| FB                               | <i>F. moniliforme</i> , <i>F. verticillioides</i> , <i>F. Proliferatum</i>                                                                          | Cereals (corn)                       | Carcinogenic, neurogenic, liver damage                                                                                                            |
| Patulin                          | <i>A. cyclopium</i> , <i>P. expansum</i> , <i>P. granulatum</i> , <i>Paecilomyces varioti</i>                                                       | Cereals and fruits                   | Brain hemorrhage, neural disorders, skin lesions, skin cancer, lung, mutagenicity, antibacterial impact                                           |
| ZEA                              | <i>F. graminearum</i> , <i>F. culmorum</i> , <i>F. semitectum</i>                                                                                   | Cereals                              | Carcinogenic, hormonal imbalance, estrogenic effect, reproductive problems, teratogenic                                                           |
